# Supplementary material for: Naloxone Use in Novel Potent Opioid and Fentanyl Overdoses in Emergency Department Patients
Source: PubMed Central journal article supplement (PMC10466160; doi:10.1001/jamanetworkopen.2023.31264), 2023-08-29
Supplement: jamanetwopen-e2331264-s001.pdf [file jamanetwopen-e2331264-s001.pdf]

Supplemental Online Content: Nonauthor Collaborators

\*First name, last name, and suffix (if applicable) are required and will appear in PubMed.

| <b>*Group Name(s): ToxIC Fentanyl Study Group</b> |                   |                              |                  |                                                     |                                          |                                                         |                                                                                            |  |
|---------------------------------------------------|-------------------|------------------------------|------------------|-----------------------------------------------------|------------------------------------------|---------------------------------------------------------|--------------------------------------------------------------------------------------------|--|
| <b>*First Name and Middle Initial(s)</b>          | <b>*Last Name</b> | <b>*Suffix (eg, Jr, III)</b> | Academic Degrees | Institution                                         | Location (city, state/province, country) | Role or Contribution, eg, chair, principal investigator | Group (if more than 1 Group listed in the byline) and/or Subgroup (eg, Steering Committee) |  |
| Jennie                                            | Buchanan          |                              | MD               | Denver Health Medical Center                        | Denver, CO, USA                          | Site Investigator                                       | ToxIC Fentanyl Study Group                                                                 |  |
| Diane                                             | Calello           |                              | MD               | Rutgers New Jersey School of Medicine               | Newark, NJ, USA                          | Site Investigator                                       | ToxIC Fentanyl Study Group                                                                 |  |
| Joseph                                            | Carpenter         |                              | MD               | Grady Memorial Hospital                             | Atlanta, GA, USA                         | Site Investigator                                       | ToxIC Fentanyl Study Group                                                                 |  |
| Jennifer                                          | Carey             |                              | MD               | University of Massachusetts Memorial Medical Center | Worcester, MA, USA                       | Site Investigator                                       | ToxIC Fentanyl Study Group                                                                 |  |
| Robert                                            | Hendrickson       |                              | MD               | Oregon Health & Science University Hospital         | Portland, OR, USA                        | Site Investigator                                       | ToxIC Fentanyl Study Group                                                                 |  |
| Bryan                                             | Judge             |                              | MD               | Corewell Health                                     | Grand Rapids, MI, USA                    | Site Investigator                                       | ToxIC Fentanyl Study Group                                                                 |  |
| Michael                                           | Levine            |                              | MD               | University of California Los Angeles                | Los Angeles, CA, USA                     | Site Investigator                                       | ToxIC Fentanyl Study Group                                                                 |  |
| Chris                                             | Meaden            |                              | MD               | Rutgers University Hospital                         | Newark, NJ, USA                          | Site Investigator                                       | ToxIC Fentanyl Study Group                                                                 |  |
| Evan                                              | Schwarz           |                              | MD               | Washington University                               | St. Louis, MO, USA                       | Site Investigator                                       | ToxIC Fentanyl Study Group                                                                 |  |
| Joshua                                            | Shulman           |                              | MD               | University of Pittsburgh Medical Center             | Pittsburgh, PA, USA                      | Site Investigator                                       | ToxIC Fentanyl Study Group                                                                 |  |
