# Supplementary material for: Naloxone Use in Novel Potent Opioid and Fentanyl Overdoses in Emergency Department Patients
Source: PubMed Central journal article supplement (PMC10466160; doi:10.1001/jamanetworkopen.2023.31264), 2023-08-29
Supplement: jamanetwopen-e2331264-s002.pdf [file jamanetwopen-e2331264-s002.pdf]

## **Data Sharing Statement**

### **Data**

**Data available:** No

### **Additional Information**

**Explanation for why data not available:** Data will be made available on a case-specific basis by requests made to the PI.
